# Supplementary material for: Pathogenic ACVR1R206H activation by Activin A‐induced receptor clustering and autophosphorylation
Source: PubMed Central journal article supplement (PMC8280795; doi:10.15252/embj.2020106317), 2021-05-18
Supplement: EMBJ-40-e106317-s020.pdf [file EMBJ-40-e106317-s020.pdf]

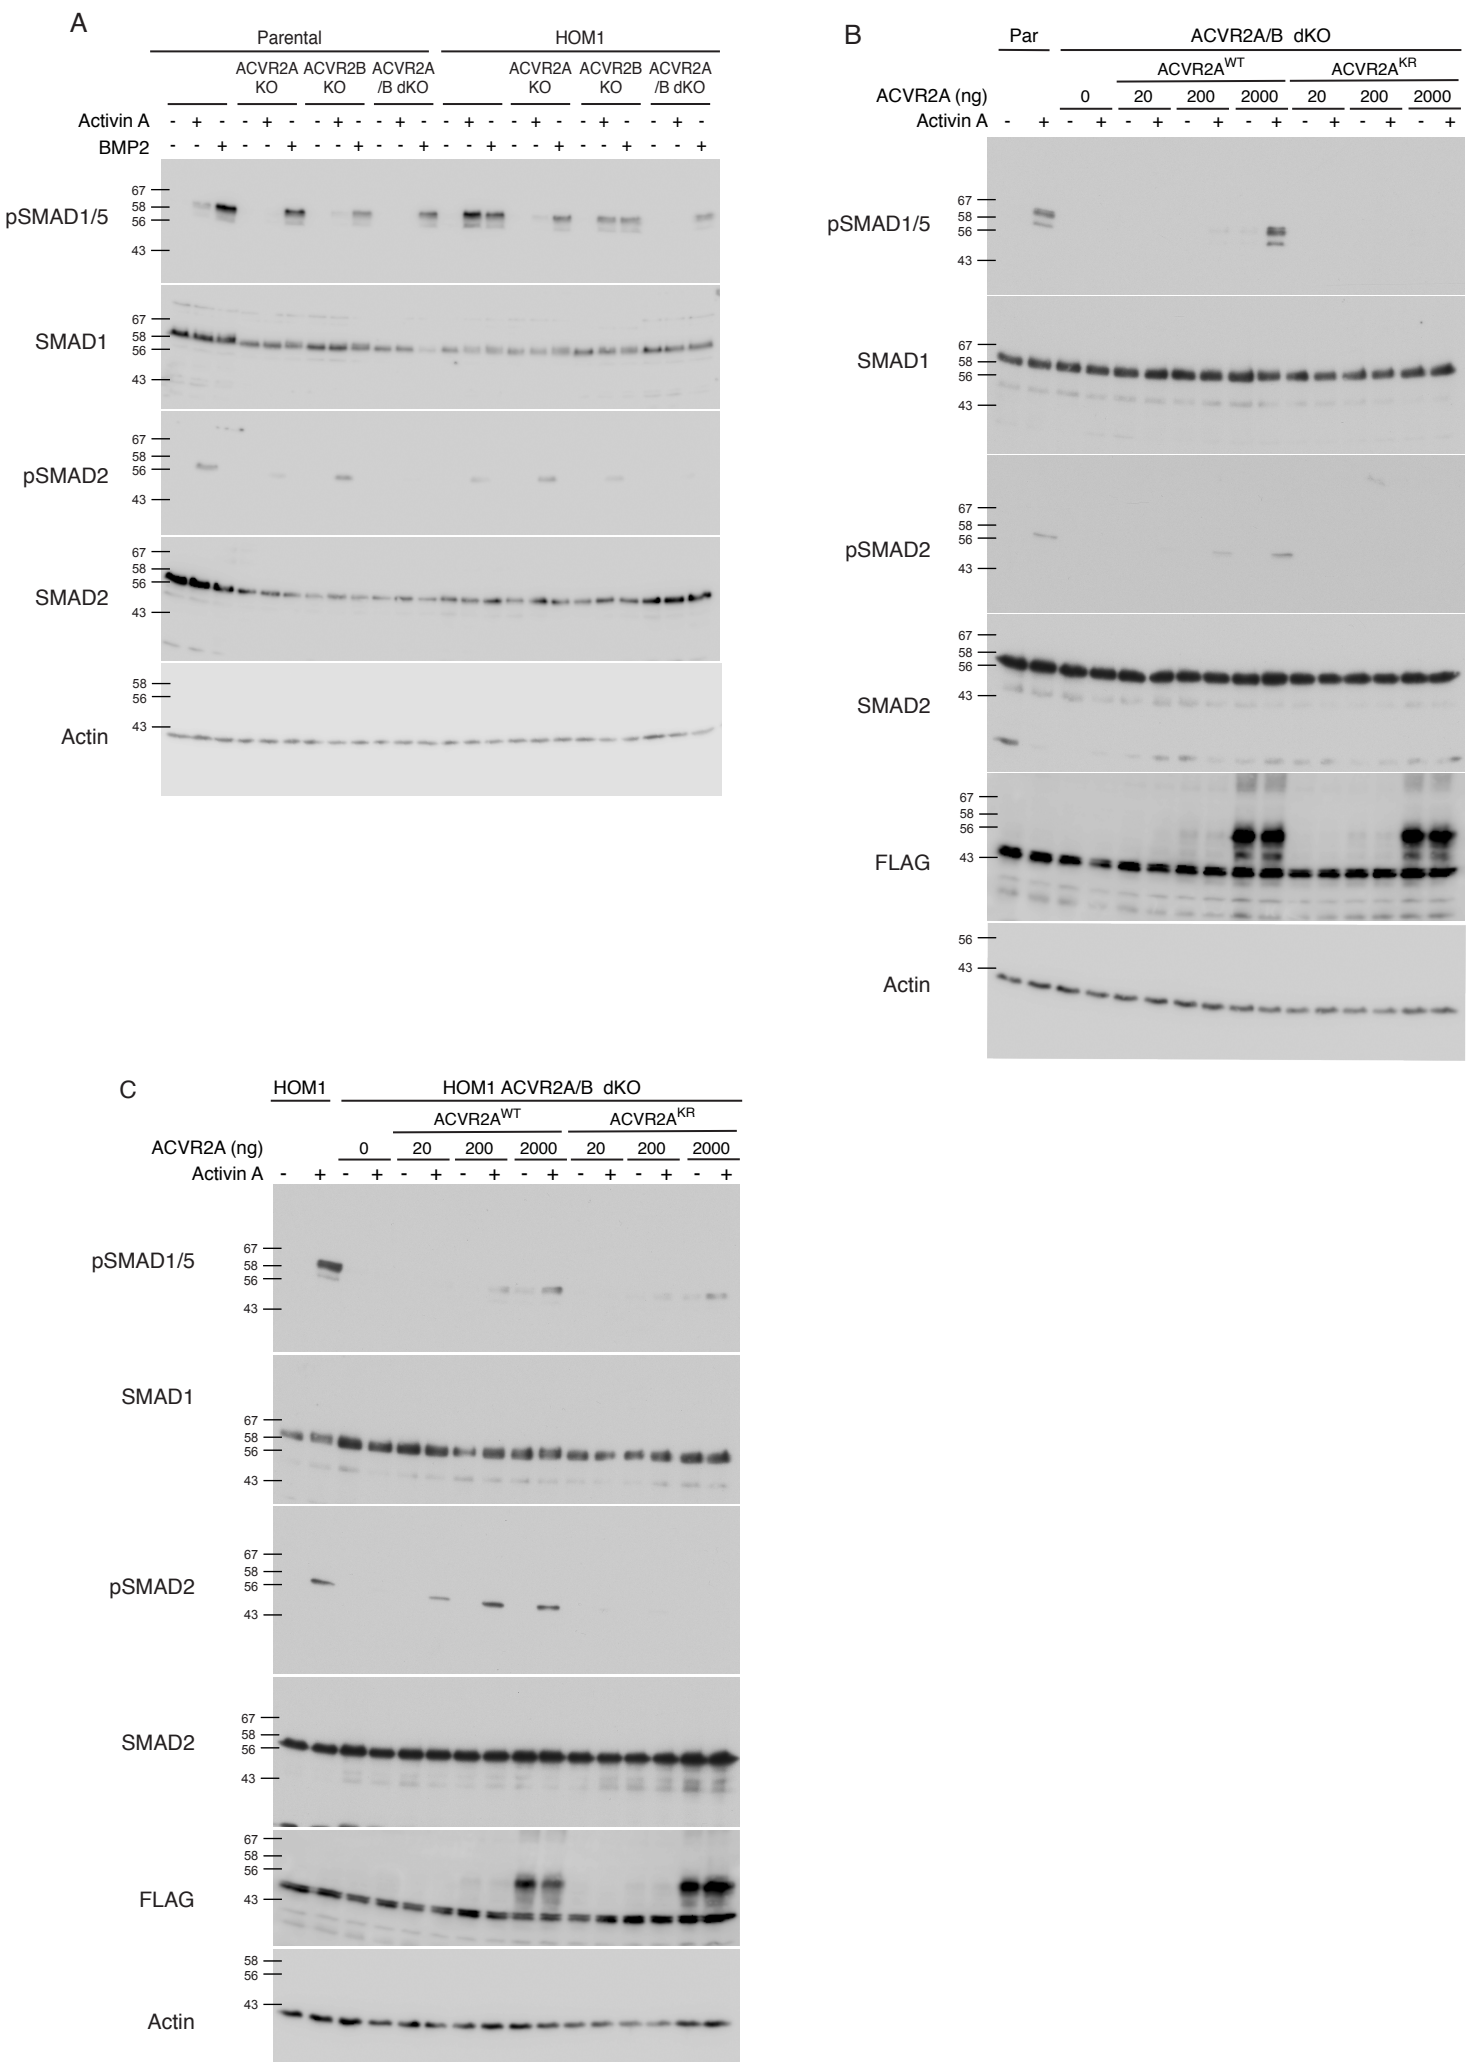

Figure 4
